# Supplementary material for: Effectiveness of Dry Needling for Myofascial Trigger Points Associated with Neck Pain Symptoms: An Updated Systematic Review and Meta-Analysis
Source: PubMed Central journal article supplement (PMC7602246; doi:10.3390/jcm9103300), 2020-10-14
Supplement: jcm-09-03300-s001.pdf [file jcm-09-03300-s001.pdf]

## Supplementary Material

**Table 1.** Main results and raw data of the included studies.

| Study              | Outcome/Group                              | Baseline Mean (SD) | Immediate, Less 1 Week After a Single Session Mean (SD) | Short-Term, 1 to 12 Weeks After Treatment Period Mean (SD) | Mid-Term, 12 to 24 Weeks Mean (SD) |
|--------------------|--------------------------------------------|--------------------|---------------------------------------------------------|------------------------------------------------------------|------------------------------------|
| Ibuldu et al. 2004 | Pain (VAS, 0-10)                           |                    |                                                         |                                                            |                                    |
|                    | G1                                         | 5.10 (1.97)        |                                                         | 3.71 (2.33) (1wk)                                          |                                    |
|                    | G2                                         | 5.50 (1.96)        |                                                         | 2.05 (1.43) (1wk)                                          |                                    |
|                    | G3 (N/A)                                   | 5.70 (1.81)        |                                                         | 3.65 (2.03) (1wk)                                          |                                    |
|                    | PPT (kPa)                                  |                    |                                                         |                                                            |                                    |
|                    | G1                                         | 214.76 (93.16)     |                                                         | 246.14 (153.96) (1wk)                                      |                                    |
|                    | G2                                         | 264.77 (69.62)     |                                                         | 391.28 (119.64) (1wk)                                      |                                    |
|                    | G3 (N/A)                                   | 248.10 (40.20)     |                                                         | 240.26 (60.80) (1wk)                                       |                                    |
|                    | Cervical Flexion (°)                       |                    |                                                         |                                                            |                                    |
|                    | G1                                         | 51.24 (7.60)       |                                                         | 59.67 (10.52) (1wk)                                        |                                    |
|                    | G2                                         | 56.10 (10.3)       |                                                         | 64.15 (9.25) (1wk)                                         |                                    |
|                    | G3 (N/A)                                   | 55.60 (10.4)       |                                                         | 50.84 (10.25) (1wk)                                        |                                    |
|                    | Cervical Extension (°)                     |                    |                                                         |                                                            |                                    |
|                    | G1                                         | 60.90 (15.26)      |                                                         | 72.86 (12.18) (1wk)                                        |                                    |
|                    | G2                                         | 65.05 (9.39)       |                                                         | 81.95 (10.84) (1wk)                                        |                                    |
| G3 (N/A)           | 63.90 (14.48)                              |                    | 65.70 (13.93) (1wk)                                     |                                                            |                                    |
| Ibuldu et al. 2004 | Right Cervical Lateral Flexion (°)         |                    |                                                         |                                                            |                                    |
|                    | G1                                         | 34.19 (7.63)       |                                                         | 41.71 (10.05) (1wk)                                        |                                    |
|                    | G2                                         | 34.40 (12.18)      |                                                         | 52.65 (10.23) (1wk)                                        |                                    |
|                    | G3 (N/A)                                   | 37.20 (7.05)       |                                                         | 41.45 (10.00) (1wk)                                        |                                    |
|                    | Left Cervical Lateral Flexion (°)          |                    |                                                         |                                                            |                                    |
|                    | G1                                         | 38.10 (8.46)       |                                                         | 49.00 (11.29) (1wk)                                        |                                    |
|                    | G2                                         | 32.80 (10.88)      |                                                         | 53.90 (12.35) (1wk)                                        |                                    |
|                    | G3 (N/A)                                   | 37.45 (9.42)       |                                                         | 44.20 (9.66) (1wk)                                         |                                    |
|                    | Cervical Lateral Flexion (mean calculated) |                    |                                                         |                                                            |                                    |
|                    | G1                                         | 36.14 (8.04)       |                                                         | 45.35 (10.67) (1wk)                                        |                                    |
| G2                 | 33.6 (11.53)                               |                    | 53.27 (11.29) (1wk)                                     |                                                            |                                    |

|                      |                                     |                   |                        |                     |
|----------------------|-------------------------------------|-------------------|------------------------|---------------------|
|                      | G3 (N/A)                            | 37.32 (8.23)      |                        | 44.82 (9.83) (1wk)  |
|                      | Right Cervical Rotation (°)         |                   |                        |                     |
|                      | G1                                  | 63.71 (16.27)     |                        | 78.52 (9.94) (1wk)  |
|                      | G2                                  | 60.00 (14.60)     |                        | 79.25 (9.98) (1wk)  |
|                      | G3 (N/A)                            | 62.90 (8.84)      |                        | 73.05 (11.46) (1wk) |
|                      | Left Cervical Rotation (°)          |                   |                        |                     |
|                      | G1                                  | 69.00 (12.58)     |                        | 77.90 (9.94) (1wk)  |
|                      | G2                                  | 62.45 (15.80)     |                        | 80.60 (13.19) (1wk) |
|                      | G3 (N/A)                            | 66.85 (10.94)     |                        | 73.80 (10.74) (1wk) |
|                      | Cervical Rotation (calculated mean) |                   |                        |                     |
|                      | G1                                  | 63.35 (14.42)     |                        | 78.21 (9.94) (1wk)  |
|                      | G2                                  | 61.22 (15.2)      |                        | 79.92 (11.58) (1wk) |
|                      | G3 (N/A)                            | 64.87 (9.89)      |                        | 73.42 (11.1) (1wk)  |
|                      | Pain (VAS, 0-10)                    |                   |                        |                     |
|                      | G1                                  | 6.7 (1.32)        |                        | 1.1 (0.93) (2wk)    |
|                      | G2                                  | 7.09 (1.4)        |                        | 5.76 (1.8) (2wk)    |
|                      | G3 (N/A)                            | 6.41 (2.07)       |                        | 5.39 (2.3) (2wk)    |
|                      | G4 (N/A)                            | 6.95 (1.86)       |                        | 5.16 (2.2) (2wk)    |
|                      | Disability (NDI)                    |                   |                        |                     |
| Itoh et al. 2007     | G1                                  | 13.0 (6.3)        |                        | 3.1 (3.2) (2wk)     |
|                      | G2                                  | 15.1 (2.7)        |                        | 12.0 (4.5) (2wk)    |
|                      | G3 (N/A)                            | 12.0 (3.6)        |                        | 11.1 (5.09) (2wk)   |
|                      | G4 (N/A)                            | 12.6 (6.0)        |                        | 10.9 (6.6) (2wk)    |
|                      | Pain (NPRS, 0-10)                   |                   |                        |                     |
|                      | G1                                  | 5.59 (4.69-6.50)  | 3.41 (2.31-4.52) (48h) |                     |
|                      | G2                                  | 5.40 (4.48 -6.32) | 4.60 (3.62-5.58) (48h) |                     |
| Myburgh et al. 2012  | PPT (kPa)                           |                   |                        |                     |
|                      | G1                                  | 216.58 (120.27)   | 186.48 (124.19) (48h)  |                     |
|                      | G2                                  | 168.76 (72.60)    | 138.55 (28.42) (48h)   |                     |
|                      | Pain (VAS, 0-10)                    |                   |                        |                     |
| Tekin et al. 2012    | G1                                  | 6.6 (1.3)         | 4.0 (1.6) (48h)        | 2.2 (2.0) (4wk)     |
|                      | G2                                  | 6.4 (1.6)         | 5.4 (1.6) (48h)        | 5.3 (1.8) (4wk)     |
|                      | Pain (VAS, 0-10)                    |                   |                        |                     |
|                      | G1                                  | 2.9 (2.8)         |                        | 1.5 (2.8) (4wk)     |
|                      | G2                                  | 3.6 (2.6)         |                        | 2.2 (2.6) (4wk)     |
| Rayegani et al. 2014 |                                     |                   |                        |                     |

|                          |                                                       |              |                    |
|--------------------------|-------------------------------------------------------|--------------|--------------------|
|                          | PPT (kPa)                                             | 266 (72)     | 374 (101) (4wk)    |
|                          | G1                                                    | 255 (82)     | 328 (94) (4wk)     |
|                          | G2                                                    |              |                    |
|                          | Pain (NPRS, 0-10)                                     |              |                    |
|                          | G1                                                    | 6.2 (1)      | 0.9 (0.8) (2wk)    |
|                          | G2                                                    | 6.2 (1.3)    | 1.0 (1.1) (2wk)    |
|                          | Disability (NPQ)                                      |              |                    |
|                          | G1                                                    | 19.1 (6.4)   | 5.4 (3.1) (2wk)    |
|                          | G2                                                    | 17.8 (7.3)   | 5.0 (3.7) (2wk)    |
|                          | PPT (kPa)                                             |              |                    |
|                          | G1                                                    | 188.1 (39.5) | 326.2 (39.0) (2wk) |
|                          | G2                                                    | 188.1 (49.4) | 247.3 (49.0) (2wk) |
|                          | Cervical Flexion (°)                                  |              |                    |
|                          | G1                                                    | 54.1 (7.0)   | 60.2 (6.6) (2wk)   |
|                          | G2                                                    | 54.2 (6.9)   | 59.8 (6.0) (2wk)   |
| Llamas-Ramos et al. 2014 | Cervical Extension (°)                                |              |                    |
|                          | G1                                                    | 60.5 (8.02)  | 68.0 (8.02) (2wk)  |
|                          | G2                                                    | 60.7 (7.5)   | 68.2 (5.1) (2wk)   |
|                          | Cervical Lateral Flexion (toward treated side) (°)    |              |                    |
|                          | G1                                                    | 38.8 (3.6)   | 43.2 (3.8) (2wk)   |
|                          | G2                                                    | 39.9 (5.0)   | 42.9 (3.7) (2wk)   |
|                          | Cervical Lateral Flexion (away from treated side) (°) |              |                    |
|                          | G1                                                    | 38.6 (3.9)   | 45.4 (3.6) (2wk)   |
|                          | G2                                                    | 38.5 (4.95)  | 44.9 (4.7) (2wk)   |
|                          | Cervical Lateral Flexion (mean calculated)            |              |                    |
|                          | G1                                                    | 38.7 (3.75)  | 44.3 (3.7) (2wk)   |
|                          | G2                                                    | 39.2 (4.95)  | 44.9 (4.7) (2wk)   |
|                          | Cervical Rotation (°) (toward treated side)           |              |                    |
| Llamas-Ramos et al. 2014 | G1                                                    | 63.5 (5.9)   | 70.0 (2.4) (2wk)   |
|                          | G2                                                    | 64.4 (5.5)   | 70.0 (3.0) (2wk)   |

|                            |                                                       |                  |                        |                      |
|----------------------------|-------------------------------------------------------|------------------|------------------------|----------------------|
|                            | Cervical Rotation (°) (away from treated side)        | 65.8 (5.4)       |                        | 70.5 (2.4) (2wk)     |
|                            | G1                                                    | 66.6 (5.8)       |                        | 69.6 (2.9) (2wk)     |
|                            | G2                                                    |                  |                        |                      |
|                            | Cervical Rotation (mean calculated)                   | 64.65 (5.65)     |                        | 70.25 (2.4) (2wk)    |
|                            | G1                                                    | 65.5 (5.65)      |                        | 69.8 (2.95) (2wk)    |
|                            | G2                                                    |                  |                        |                      |
|                            | Pain (VAS, 0-10)                                      |                  |                        |                      |
|                            | G1                                                    | 6.56 (1.53)      |                        | 1.34 (1.93) (1wk)    |
|                            | G2                                                    | 6.23 (1.26)      |                        | 3.05 (2.27) (1wk)    |
| Ziaiefar et al. 2014       | PPT (kPa)                                             |                  |                        |                      |
|                            | G1                                                    | 104.041 (39.324) |                        | 161.12 (45.69) (1wk) |
|                            | G2                                                    | 106.597 (38.441) |                        | 142.19 (43.54) (1wk) |
|                            | Pain (NPRS, 0-10)                                     |                  |                        |                      |
|                            | G1                                                    | 5.7 (1.8)        | 3.8 (1.9) (10min)      | 2.0 (1.7) (1wk)      |
|                            | G2                                                    | 5.3 (2.0)        | 5.5 (2.1) (10 min)     | 4.6 (2.1) (1wk)      |
|                            | PPT (kPa)                                             |                  |                        |                      |
|                            | G1                                                    | 224.8 (100.3)    | 294.0 (69.6) (10 min)  | 353.7 (92.3) (1wk)   |
|                            | G2                                                    | 285.1 (102.4)    | 282.0 (109.5) (10 min) | 296.1 (89.7) (1wk)   |
| Mejuto-Vázquez et al. 2014 | Cervical Flexion (°)                                  |                  |                        |                      |
|                            | G1                                                    | 58.3 (12.2)      | 68.3 (13.4) (10min)    | 67.7 (5.0) (1wk)     |
|                            | G2                                                    | 51.2 (9.9)       | 46.2 (9.5) (10min)     | 50.6 (7.7) (1wk)     |
|                            | Cervical Extension (°)                                |                  |                        |                      |
|                            | G1                                                    | 65.0 (16.2)      | 78.8 (12.6) (10min)    | 80.5 (8.4) (1wk)     |
|                            | G2                                                    | 61.8 (13.6)      | 58.1 (16.0) (10min)    | 60.2 (16.3) (1wk)    |
|                            | Cervical Lateral Flexion (toward treated side) (°)    |                  |                        |                      |
|                            | G1                                                    | 36.1 (13.4)      | 48.3 (6.6) (10min)     | 51.6 (4.3) (1wk)     |
|                            | G2                                                    | 38.7 (12.7)      | 38.1 (10.0) (10min)    | 41.2 (10.3) (1wk)    |
|                            | Cervical Lateral Flexion (away from treated side) (°) |                  |                        |                      |
|                            | G1                                                    | 39.4 (15.1)      | 51.6 (9.3) (10min)     | 52.2(6.6) (1wk)      |
|                            | G2                                                    | 36.2 (11.5)      | 37.5 (12.8) (10min)    | 42.5 (8.5) (1wk)     |
|                            | Cervical Lateral Flexion (mean calculated)            |                  |                        |                      |
|                            | G1                                                    | 37.75 (14.25)    | 49.95 (7.95) (10min)   | 51.9 (5.45) (1wk)    |
|                            | G2                                                    | 37.45 (12.10)    | 37.8 (11.4) (10min)    | 41.85 (9.4) (1wk)    |
|                            | Cervical Rotation (°) (toward treated side)           |                  |                        |                      |

|                            |                                                |                       |                         |                       |  |
|----------------------------|------------------------------------------------|-----------------------|-------------------------|-----------------------|--|
| Mejuto-Vázquez et al. 2014 | G1                                             | 55.5 (24.1)           | 66.6 (15.6) (10min)     | 72.7 (14.1) (1wk)     |  |
|                            | G2                                             | 58.1 (15.1)           | 53.7 (15.0) (10min)     | 57.5 (7.0) (1wk)      |  |
|                            | Cervical Rotation (°) (away from treated side) |                       |                         |                       |  |
|                            | G1                                             | 58.8 (23.5)           | 68.3 (15.4) (10min)     | 74.4 (8.0) (1wk)      |  |
|                            | G2                                             | 59.3 (18.2)           | 55.1 (18.2) (10min)     | 58.7 (7.9) (1wk)      |  |
|                            | Cervical Rotation (mean calculated)            |                       |                         |                       |  |
|                            | G1                                             | 57.15 (23.8)          | 67.45 (15.5) (10min)    | 73.55 (11.05) (1wk)   |  |
|                            | G2                                             | 58.7 (16.65)          | 54.4 (16.6) (10min)     | 58.1 (7.45) (1wk)     |  |
|                            | <hr/>                                          |                       |                         |                       |  |
|                            | Campa-Moran et al. 2015                        | VAS Pain (0-10)†      |                         |                       |  |
| G1                         |                                                | 3.38 (1.17)           | 3.97 (1.77) (10min)     | 1.33 (1.47) (1wk)     |  |
| G2                         |                                                | 5.02 (1.77)           | 3.82 (1.92) (10min)     | 3.43 (1.47) (1wk)     |  |
| G3                         |                                                | 4.21 (1.63)           | 2.98 (1.77) (10min)     | 0.94 (1.43) (1wk)     |  |
| G2 + G3 (n=24)             |                                                | 4.61 (1.71)           | 3.4 (1.85)              | 2.18 (1.90)           |  |
| Disability (NDI)           |                                                |                       |                         |                       |  |
| G1                         |                                                | 18.0 (5.4)            |                         | 12.2 (5.66) (1wk)     |  |
| G2                         |                                                | 17.4 (4.8)            |                         | 15.2 (5.66) (1wk)     |  |
| G3                         |                                                | 18.5 (3.2)            |                         | 10.0 (5.50) (1wk)     |  |
| G2 + G3 (n = 24)           |                                                | 17.95 (4.02)          |                         | 12.6 (6.06)           |  |
| PPT (kPa)†                 |                                                |                       |                         |                       |  |
| G1                         |                                                | 292.93 (294.18)       | 295.48 (188.32) (10min) | 316.47 (306.75) (1wk) |  |
| G2                         |                                                | 228.04 (107.72)       | 172.17 (129.11) (10min) | 249.92 (152.96) (1wk) |  |
| G3                         |                                                | 257.18 (133.22)       | 344.66 (109.37) (10min) | 398.23 (51.80) (1wk)  |  |
| G2 + G3 (n = 24)           |                                                | 242.61 (119.41)       | 258.41 (146.47)         | 324.07 (134.94)       |  |
| Cervical Flexion (°)†      |                                                |                       |                         |                       |  |
| G1                         |                                                | 38.04 (3.68)          | 39.48 (16.07) (10min)   | 44.78 (7.88) (1wk)    |  |
| G2                         |                                                | 40 (15.76)            | 46.45 (19.37) (10min)   | 41.04 (14.67) (1wk)   |  |
| G3                         |                                                | 39.63 (13.41)         | 45.18 (16.77) (10min)   | 53.41 (10.48) (1wk)   |  |
| G2 + G3 (n = 24)           |                                                | 39.81 (14.31)         | 45.91 (17.73)           | 47.22 (13.97)         |  |
| Cervical Extension (°) †   |                                                |                       |                         |                       |  |
| G1                         |                                                | 43.39 (14.50)         | 49.96 (16.26) (10min)   | 50.62 (15.34) (1wk)   |  |
| G2                         | 43.41 (27.25)                                  | 40.54 (16.26) (10min) | 48.64 (4.27) (1wk)      |                       |  |
| G3                         | 53.32 (25.15)                                  | 55.49 (29.35) (10min) | 60.43 (5.19) (1wk)      |                       |  |
| G2 + G3 (n = 24)           | 48.36 (26.12)                                  | 48.01 (24.42)         | 54.53 (7.60)            |                       |  |
| <hr/>                      |                                                |                       |                         |                       |  |
| Pain (NPRS, 0-10)          |                                                |                       |                         |                       |  |
| G1                         |                                                |                       |                         |                       |  |

|                         |                   |                                |                      |                      |                   |
|-------------------------|-------------------|--------------------------------|----------------------|----------------------|-------------------|
| Pecos-Martin et al 2015 | G2                | 5.3 (1.5)                      | 2.6 (1.8) (1wk)      | 2.1 (1.6) (4wk)      |                   |
|                         |                   | 5.6 (1.6)                      | 5.3 (1.6) (1wk)      | 5.1 (1.5) (4wk)      |                   |
|                         | Disability (NPQ)  |                                |                      |                      |                   |
|                         | G1                |                                |                      |                      |                   |
|                         | G2                | 22.1 (11.4)                    |                      | 9.9 (7.4) (4wk)      |                   |
|                         |                   | 19.7 (7.9)                     |                      | 19.7 (7.9) (4wk)     |                   |
|                         | PPT (kPa)         |                                |                      |                      |                   |
|                         | G2                | 274.58 (49.03)                 | 421.68 (58.83) (1wk) | 431.49 (49.03) (4wk) |                   |
|                         | 274.58 (58.83)    | 343.23 (68.64) (1wk)           | 294.19 (58.83) (4wk) |                      |                   |
| Aridici et al. 2016     | Pain (VAS, 0-10)  |                                |                      |                      |                   |
|                         | G1                | 7.80 (1.72)                    |                      | 4.58 (1.85) (1wk)    |                   |
|                         | G2                | 7.66 (1.66)                    |                      | 4.20 (2.05) (1wk)    |                   |
|                         | Disability (NPDS) |                                |                      |                      |                   |
|                         | G1                | 66.54 (16.84)                  |                      | 42.74 (20.95) (1wk)  |                   |
|                         | G2                | 66.0 (14.46)                   |                      | 39.56 (19.77) (1wk)  |                   |
| Segura-Ortí et al. 2016 | Pain (VAS, 0-100) |                                |                      |                      |                   |
|                         | G1                | 36.2 (22.5)                    |                      | 17.7 (14.7) (1wk)    |                   |
|                         | G2                | 46.9 (20.9)                    |                      | 18.6 (10.3) (1wk)    |                   |
|                         | G3 (N/A)          | 34.2 (17.5)                    |                      | 12.3 (9.3) (1wk)     |                   |
|                         | PPT (kPa)         |                                |                      |                      |                   |
|                         | G1                | 215.8 (78.5)                   |                      | 245.2 (78.5) (1wk)   |                   |
|                         | G2                | 215.8 (29.4)                   |                      | 245.2 (29.4) (1wk)   |                   |
|                         | G3 (N/A)          | 196.1 (29.4)                   |                      | 225.6 (58.8) (1wk)   |                   |
|                         | Disability (NDI)  |                                |                      |                      |                   |
|                         | G1                | 7.2 (3.4)                      |                      | 5.8 (4.2) (1wk)      |                   |
|                         | G2                | 10.2 (7.7)                     |                      | 4.8 (3.1) (1wk)      |                   |
| G3 (N/A)                | 8.8 (4.0)         |                                | 7.0 (3.7) (1wk)      |                      |                   |
| Hayta et al. 2016       | Pain (VAS,0-10)   |                                |                      |                      |                   |
|                         | G1                | 7.1 (1.2)                      |                      | 5.5 (1.2) (4wk)      | 3.8 (1.1) (12wk)  |
|                         | G2                | 7.1 (1.2)                      |                      | 5.7 (1.2) (4wk)      | 4.2 (1.3) (12wk)  |
|                         | Disability (NDI)  |                                |                      |                      |                   |
|                         | G1                | 18.4 (7.0)                     |                      | 12.6 (5.6) (4wk)     | 7.6 (3.7) (12wk)  |
|                         | G2                | 19.7 (5.8)                     |                      | 15.9 (5.6) (4wk)     | 11.1 (5.3) (12wk) |
| Ziaefar et al. 2016     | Pain (NPRS,0-10)  |                                |                      |                      |                   |
| G1                      | 7.96 (1.52)       | 7.85 (2.24) <sup>†</sup> (48h) |                      |                      |                   |

|                                  |                        |                 |                        |                       |
|----------------------------------|------------------------|-----------------|------------------------|-----------------------|
|                                  | G2                     | 8.26 (1.71)     | 7.55 (2.17) + (48h)    |                       |
|                                  | PPT (kPa)              |                 |                        |                       |
|                                  | G1                     | 104.05 (39.32)  | 102.57 (47.85) + (48h) |                       |
|                                  | G2                     | 106.59 (38.24)  | 123.17 (42.75) + (48h) |                       |
|                                  | Pain (VAS, 0-10)       |                 |                        |                       |
|                                  | G1                     | 5.00 (1.89)     | 3.76 (1.70) (72h)      | 3.05 (1.98) (1wk)     |
|                                  | G2                     | 4.76 (1.72)     | 2.43 (1.69) (72h)      | 2.67 (2.30) (1wk)     |
|                                  | G3                     | 4.81 (1.82)     | 2.48 (1.88) (72h)      | 2.24 (2.30) (1wk)     |
| Fernández-Carnero et al.<br>2017 | G1 + G2 + G3 (n=63)    | 4.85 (1.77)     | 2.88 (1.83) (72h)      | 2.65 (2.09) (1wk)     |
|                                  | G4                     | 4.81 (1.86)     | 3.33 (2.45) (72h)      | 3.52 (2.35) (1wk)     |
|                                  | Disability (NDI)       |                 |                        |                       |
|                                  | G1                     | 12.76 (7.09)    |                        | 7.05 (3.51) (1wk)     |
|                                  | G2                     | 12.14 (4.94)    |                        | 7.14 (4.44) (1wk)     |
|                                  | G3                     | 11.05 (5.01)    |                        | 7.19 (5.95) (1wk)     |
|                                  | G1 + G2 + G3 (n=63)    | 11.98 (5.71)    |                        | 7.12 (4.66) (1wk)     |
|                                  | G4                     | 11.62 (5.94)    |                        | 8.19 (6.00) (1wk)     |
|                                  | PPT (kPa)              |                 |                        |                       |
|                                  | G1                     | 176.51 (93.16)  | 174.55 (110.81) (72h)  | 183.38 (85.31) (1wk)  |
|                                  | G2                     | 176.51 (59.82)  | 182.40 (73.54) (72h)   | 187.30 (108.85) (1wk) |
|                                  | G3                     | 204.95 (100.02) | 236.33 (152.98) (72h)  | 243.37 (137.29) (1wk) |
|                                  | G1 + G2 + G3 (n=63)    | 185.99 (85.80)  | 197.75 (118.41) (72h)  | 204.68 (114.07) (1wk) |
|                                  | G4                     | 178.48 (90.22)  | 163.77 (85.31) (72h)   | 181.42 (85.31) (1wk)  |
| Fernández-Carnero et al.<br>2017 | Cervical Flexion (°)   |                 |                        |                       |
|                                  | G1                     | 48.66 (11.62)   | 49.06 (10.44) (72h)    | 47.61 (11.49) (1wk)   |
|                                  | G2                     | 51.44 (7.85)    | 54.92 (7.82) (72h)     | 52.65 (8.09) (1wk)    |
|                                  | G3                     | 48.41 (10.66)   | 49.76 (11.02) (72h)    | 50.79 (11.03) (1wk)   |
|                                  | G1 + G2 + G3 (n = 63)  | 49.50 (10.09)   | 51.24 (10.04) (72h)    | 50.35 (10.36) (1wk)   |
|                                  | G4                     | 47.87 (12.11)   | 47.16 (9.09) (72h)     | 49.20 (10.81) (1wk)   |
|                                  | Cervical Extension (°) |                 |                        |                       |
|                                  | G1                     | 58.15 (18.83)   | 58.03 (13.93) (72h)    | 62.85 (14.79) (1wk)   |
|                                  | G2                     | 59.25 (13.96)   | 62.82 (13.07) (72h)    | 64.12 (12.71) (1wk)   |
|                                  | G3                     | 58.47 (13.18)   | 58.73 (14.69) (72h)    | 61.03 (13.55) (1wk)   |
|                                  | G1 + G2 + G3 (n = 63)  | 58.62 (15.27)   | 59.85 (13.84) (72h)    | 62.66 (13.54) (1wk)   |
|                                  | G4                     | 59.52 (16.60)   | 60.22 (13.97) (72h)    | 60.06 (14.97) (1wk)   |
|                                  | Lateral Flexion (°)    |                 |                        |                       |
|                                  | G1                     | 36.11 (8.05)    | 37.80 (5.35) (72h)     | 38.57 (6.7) (1wk)     |
|                                  | G2                     | 39.27 (5.16)    | 53.27 (7.72) (72h)     | 41.70 (5.58) (1wk)    |

|                                    |                             |                   |                       |                     |                    |
|------------------------------------|-----------------------------|-------------------|-----------------------|---------------------|--------------------|
| Fernández-Carnero et al.<br>2017   | G3                          | 39.76 (7.95)      | 40.76 (6.89) (72h)    | 41.13 (7.55) (1wk)  |                    |
|                                    | G1 + G2 + G3 (n = 63)       | 38.38 (8.01)      | 43.94 (9.45) (72h)    | 40.46 (6.69) (1wk)  |                    |
|                                    | G4                          | 38.79 (9.67)      | 39.58 (9.45) (72h)    | 40.17 (9.48) (1wk)  |                    |
|                                    | Cervical Rotation (°)       |                   |                       |                     |                    |
|                                    | G1                          | 58.44 (11.8)      | 59.76 (8.69) (72h)    | 58.83 (9.85) (1wk)  |                    |
|                                    | G2                          | 62.78 (6.60)      | 66.36 (6.68) (72h)    | 66.51 (7.75) (1wk)  |                    |
|                                    | G3                          | 60.10 (8.83)      | 62.09 (7.52) (72h)    | 62.96 (6.71) (1wk)  |                    |
|                                    | G1 + G2 + G3 (n = 63)       | 60.44 (9.34)      | 62.73 (8.03) (72h)    | 62.76 (8.66) (1wk)  |                    |
|                                    | G4                          | 59.76 (9.60)      | 57.25 (12.08) (72h)   | 58.58 (11.61) (1wk) |                    |
|                                    | De Meulemeester et al. 2017 | Pain (NPRS, 0-10) |                       |                     |                    |
| G1                                 |                             | 4.70 (1.81)       |                       | 3.59 (2.06) (12wk)  |                    |
| G2                                 |                             | 5.86 (1.36)       |                       | 4.19 (1.97) (12wk)  |                    |
| Disability (NDI)                   |                             |                   |                       |                     |                    |
| G1                                 |                             | 11.00 (5.12)      |                       | 7.71 (4.66) (4wk)   | 8.06 (5.08) (12wk) |
| G2                                 |                             | 13.14 (4.60)      |                       | 10.95 (4.63) (4wk)  | 9.09 (4.35) (12wk) |
| PPT (kPa)                          |                             |                   |                       |                     |                    |
| G1                                 |                             | 196.2 (72.6)      | 164.6 (69.7) (10 min) | 240.01 (84.5) (4wk) |                    |
| G2                                 |                             | 162 (59.6)        | 165.9 (68.7) (10 min) | 214.7 (81.8) (4wk)  |                    |
| Sobhani et al. 2017                |                             | Pain (VAS, 0-100) |                       |                     |                    |
|                                    | G1                          | 56.1 (19.3)       |                       | 39.2 (20) (5wk)     |                    |
|                                    | G2                          | 53.8 (16.0)       |                       | 33.8 (12.6) (5wk)   |                    |
|                                    | G3                          | 61.5(18.1)        |                       | 36.9 (14.9) (5wk)   |                    |
|                                    | Disability (NDI)            |                   |                       |                     |                    |
|                                    | G1                          | 21.6 (4.8)        |                       | 16.7 (3.9) (5wk)    |                    |
|                                    | G2                          | 24.4 (7.6)        |                       | 19.6 (6.5) (5wk)    |                    |
|                                    | G3                          | 26.6 (7.8)        |                       | 21.4 (6.0) (5wk)    |                    |
|                                    | Cervical Flexion (°)        |                   |                       |                     |                    |
|                                    | G1                          | 49.2 (8.8)        |                       | 55.1 (7.6) (5wk)    |                    |
| G2                                 | 47.7 (11.6)                 |                   | 52.7 (10.8) (5wk)     |                     |                    |
| G3                                 | 46.7 (9.3)                  |                   | 50.6(10.2) (5wk)      |                     |                    |
| Sobhani et al. 2017                | Cervical Extension (°)      |                   |                       |                     |                    |
|                                    | G1                          | 49.4 (8.0)        |                       | 53.1 (7.6) (5wk)    |                    |
|                                    | G2                          | 46.8 (8.7)        |                       | 51.1 (8.4) (5wk)    |                    |
| G3                                 | 47.6 (10.3)                 |                   | 53.5 (8.8) (5wk)      |                     |                    |
| Right Cervical Lateral Flexion (°) |                             |                   |                       |                     |                    |
| G1                                 | 37.6 (6.0)                  |                   | 41.9 (6.3) (5wk)      |                     |                    |
| G2                                 | 35.4 (6.8)                  |                   | 39.5 (6.5) (5wk)      |                     |                    |



|                     |                                            |                |                        |                           |                       |
|---------------------|--------------------------------------------|----------------|------------------------|---------------------------|-----------------------|
|                     | G3                                         | 35.3 (6.3)     |                        | 39.9 (6.0) (5wk)          |                       |
|                     | Left Cervical Lateral Flexion (°)          |                |                        |                           |                       |
|                     | G1                                         | 37.1 (5.5)     |                        | 39.8 (5.5) (5wk)          |                       |
|                     | G2                                         | 34.1 (6.4)     |                        | 37.2 (6.1) (5wk)          |                       |
|                     | G3                                         | 32.5 (6.1)     |                        | 35.6 (5.8) (5wk)          |                       |
|                     | Cervical Lateral Flexion (mean calculated) |                |                        |                           |                       |
|                     | G1                                         | 37.35 (5.75)   |                        | 40.85 (5.9) (5wk)         |                       |
|                     | G2                                         | 34.75 (6.6)    |                        | 38.35 (6.3) (5wk)         |                       |
|                     | G3                                         | 33.9 (6.2)     |                        | 37.75 (5.9) (5wk)         |                       |
|                     | Right Cervical Rotation (°)                |                |                        |                           |                       |
| Sobhani et al. 2017 | G1                                         | 75.3 (7.5)     |                        | 77.8 (7.3) (5wk)          |                       |
|                     | G2                                         | 75.0 (9.9)     |                        | 83.3 (8.6) (5wk)          |                       |
|                     | G3                                         | 73.1 (5.3)     |                        | 74.4(4.9) (5wk)           |                       |
|                     | Left Cervical Rotation (°)                 |                |                        |                           |                       |
|                     | G1                                         | 75.0 (6.5)     |                        | 77.5 (6.1) (5wk)          |                       |
|                     | G2                                         | 74.7 (8.7)     |                        | 82.3 (6.8) (5wk)          |                       |
|                     | G3                                         | 72.2 (4.8)     |                        | 74.5 (5.2) (5wk)          |                       |
|                     | Cervical Rotation (°)<br>(mean calculated) |                |                        |                           |                       |
|                     | G1                                         | 75.15 (7)      |                        | 77.65 (6.7) (5wk)         |                       |
|                     | G2                                         | 74.85 (9.35)   |                        | 82.8 (7.7) (5wk)          |                       |
|                     | G3                                         | 72.65 (5.05)   |                        | 74.45 (5.05) (5wk)        |                       |
|                     | Pain (VAS, 0-10)                           |                |                        |                           |                       |
|                     | G1                                         | 3.78 (1.18)    | 2.78 (1.07) (10min)    | 1.91 (1.00) (1mo)         | 1.69 (1.03) (12wk)    |
|                     | G2                                         | 3.57 (1.04)    | 2.93 (0.94) (10min)    | 1.73 (0.91) (1mo)         | 1.50 (0.82) (12wk)    |
|                     | PPT (kPa)                                  |                |                        |                           |                       |
|                     | G1                                         | 198.63 (35.16) | 246.03 (46.91) (10min) | 317.09 (49.82) (1mo)      | 320.84 (46.08) (12wk) |
|                     | G2                                         | 206.90 (34.24) | 253.10 (51.26) (10min) | 320.13 (61.15) (1mo)      | 316.97 (52.37) (12wk) |
| Luan et al. 2019    | Disability (NDI)                           |                |                        |                           |                       |
|                     | G1                                         | 15.31 (2.44)   |                        | 9.38 (2.46) (1mo)         | 9.47 (1.87) (12wk)    |
|                     | G2                                         | 15.37 (2.04)   |                        | 9.57 (1.77) (1mo)         | 9.07 (1.70) (12wk)    |
|                     | Pain (VAS, 0-100)                          |                |                        |                           |                       |
|                     | G1                                         | 36.7 (25.6)    |                        | 10.75 (3.39, 18.11) (4wk) |                       |
|                     | G2                                         | 45.4 (28.1)    |                        | 16.98 (7.92, 26.60) (4wk) |                       |
|                     | PPT (kPa)                                  |                |                        |                           |                       |

|                                    |                              |                    |                          |                                    |
|------------------------------------|------------------------------|--------------------|--------------------------|------------------------------------|
| Dogan et al. 2019                  | G1                           | 313.81 (78.45)     |                          | 382.4 (323.6, 441.2) (4wk)         |
|                                    | G2                           | 294.19 (107.87)    |                          | 402 (343.2, 451.1) (4wk)           |
|                                    | Cervical Lateral Flexion (°) |                    |                          |                                    |
|                                    | G1                           | 40 (30-50)         |                          | 45.8 (43.2, 48.8) (4wk)            |
|                                    | G2                           | 40 (25-50)         |                          | 46.7 (44.1, 49.4) (4wk)            |
|                                    | Disability (NDI, %)          |                    |                          |                                    |
| G1                                 | 32.6 (13.8)                  |                    | 15.3 (10.2, 20.4) (4wk)  |                                    |
| G2                                 | 31.2 (11.3)                  |                    | 14.8 (10.25, 18.8) (4wk) |                                    |
| Manafnezhad et al. 2019            | Pain (VAS, 0-10)             |                    |                          |                                    |
|                                    | G1                           | 7.5 (1.7)          |                          | 3.79 (2.20) (1wk)                  |
|                                    | G2                           | 7.3 (1.3)          |                          | 3.89 (2.16) (1wk)                  |
|                                    | Disability (NDI)             |                    |                          |                                    |
|                                    | G1                           | 28.2 (10.2)        |                          | 15.29 (8.85) (1wk)                 |
|                                    | G2                           | 25.6 (11.3)        |                          | 16.75 (11.69) (1wk)                |
|                                    | PPT (kPa)                    |                    |                          |                                    |
|                                    | G1                           | 225.55 (72.56)     |                          | 338.32 (100.02) <sup>a</sup> (1wk) |
|                                    | G2                           | 231.43 (94.14)     |                          | 314.79 (113.75) <sup>a</sup> (1wk) |
|                                    | Martín-Rodríguez et al, 2019 | Pain (VAS, 0-10)   |                          |                                    |
| G1                                 |                              | 2.5 (1.86)         | 2.5 (2.16) (24h)         | 1.7 (2.16) (4wk)                   |
| G2                                 |                              | 3.6 (2.20)         | 3.9 (2.45) (24h)         | 1.4 (1.53) (4wk)                   |
| Disability (NDI)                   |                              |                    |                          |                                    |
| G1                                 |                              | 17.1 (12.23)       |                          | 11.9 (9.02) (4wk)                  |
| G2                                 |                              | 23.2 (13.83)       |                          | 16.0 (12.85) (4wk)                 |
| Cervical Flexion (°)               |                              |                    |                          |                                    |
| G1                                 |                              | 55.0 (9.68)        | 51.9 (11.41) (24h)       | 54.2 (14.57) (4wk)                 |
| G2                                 |                              | 55.1 (11.26)       | 49.4 (9.97) (24h)        | 52.8 (14.57) (4wk)                 |
| Cervical Extension (°)             |                              |                    |                          |                                    |
| G1                                 |                              | 63.4 (14.10)       | 66.8 (12.11) (24h)       | 63.8 (13.47) (4wk)                 |
| G2                                 |                              | 59.7 (14.179)      | 57.1 (9.35) (24h)        | 58.7 (14.84) (4wk)                 |
| Right Cervical Lateral Flexion (°) |                              |                    |                          |                                    |
| G1                                 |                              | 36.8 (6.00)        | 38.4 (10.89) (24h)       | 38.6 (7.40) (4wk)                  |
| G2                                 |                              | 41.0 (11.60)       | 38.6 (9.42) (24h)        | 38.5 (7.66) (4wk)                  |
| Left Cervical Lateral Flexion (°)  |                              |                    |                          |                                    |
| G1                                 | 40.4 (6.53)                  | 41.1 (10.93) (24h) | 41.8 (7.93) (4wk)        |                                    |

|                              |                                            |                |                     |                      |
|------------------------------|--------------------------------------------|----------------|---------------------|----------------------|
|                              | G2                                         | 45.7 (9.32)    | 42.2 (7.28) (24h)   | 40.3 (8.09) (4wk)    |
|                              | Cervical Lateral Flexion (mean calculated) |                |                     |                      |
|                              | G1                                         | 38.6 (6.26)    | 39.75 (10.91) (24h) | 40.2 (7.66) (4wk)    |
|                              | G2                                         | 43.35 (10.46)  | 40.4 (8.35) (24h)   | 39.4 (7.87) (4wk)    |
| Martín-Rodríguez et al, 2019 | Right Cervical Rotation (°)                |                |                     |                      |
|                              | G1                                         | 66.3 (9.50)    | 61.9 (13.79) (24h)  | 68.9 (9.12) (4wk)    |
|                              | G2                                         | 59.6 (14.32)   | 63.3 (10.36) (24h)  | 67.7 (9.25) (4wk)    |
|                              | Left Cervical Rotation (°)                 |                |                     |                      |
|                              | G1                                         | 66.2 (12.15)   | 65.9 (12.74) (24h)  | 65.6 (9.91) (4wk)    |
|                              | G2                                         | 61.1 (13.08)   | 65.2 (11.18) (24h)  | 64.9 (8.31) (4wk)    |
|                              | Cervical Rotation (mean calculated)        |                |                     |                      |
|                              | G1                                         | 66.25 (10.82)  | 63.9 (13.26) (24h)  | 67.25 (9.51) (4wk)   |
|                              | G2                                         | 60.35 (13.7)   | 64.25 (10.77) (24h) | 66.3 (8.78) (4wk)    |
|                              | Pain (VAS, 0-10)                           |                |                     |                      |
|                              | G1                                         | 6.51 (0.37)    |                     | 3.3 (0.24) (2wk)     |
|                              | G2                                         | 6.64 (0.82)    |                     | 4 (0.85) (2wk)       |
|                              | G3                                         | 6.5 (0.78)     |                     | 2.96 (0.3) (2wk)     |
| Tabatabaiee et al. 2019      | PPT (kPa)                                  |                |                     |                      |
|                              | G1                                         | 111.89 (54.91) |                     | 185.34 (29.41) (2wk) |
|                              | G2                                         | 113.26 (54.91) |                     | 158.86 (82.37) (2wk) |
|                              | G3                                         | 112.08 (81.39) |                     | 181.61 (35.30) (2wk) |
|                              | Ipsilateral Cervical Lateral Flexion (°)   |                |                     |                      |
|                              | G1                                         | 37.84 (0.76)   |                     | 42.68 (0.47) (2wk)   |
|                              | G2                                         | 37.74 (0.73)   |                     | 40.69 (0.92) (2wk)   |
|                              | G3                                         | 37.76 (0.87)   |                     | 43.21 (0.42) (2wk)   |
|                              | Contralateral Lateral Flexion (°)          |                |                     |                      |
|                              | G1                                         | 36.67 (0.64)   |                     | 43.66 (0.49) (2wk)   |
|                              | G2                                         | 36.4 (0.91)    |                     | 41.54 (0.68) (2wk)   |
|                              | G3                                         | 36.21 (0.84)   |                     | 43.8 (0.83) (2wk)    |
|                              | Cervical Lateral Flexion (mean calculated) |                |                     |                      |
|                              | G1                                         | 37.25 (0.7)    |                     | 43.17 (0.48) (2wk)   |
| Tabatabaiee et al. 2019      | G2                                         | 37.07 (0.82)   |                     | 41.11 (0.8) (2wk)    |
|                              | G3                                         | 36.98 (0.85)   |                     | 43.5 (0.62) (2wk)    |
|                              | Ipsilateral Cervical Rotation (°)          |                |                     |                      |

|                  |                                            |              |                    |
|------------------|--------------------------------------------|--------------|--------------------|
|                  | G1                                         | 69.37 (0.86) | 73.03 (0.8) (2wk)  |
|                  | G2                                         | 69.1 (0.93)  | 76.39 (0.55) (2wk) |
|                  | G3                                         | 68.96 (1.09) | 76.22 (0.92) (2wk) |
|                  | Contralateral Cervical Rotation (°)        |              |                    |
|                  | G1                                         | 71.33 (0.74) | 75.68 (0.56) (2wk) |
|                  | G2                                         | 70.58 (0.47) | 73.55 (0.90) (2wk) |
|                  | G3                                         | 71.19 (0.79) | 75.44 (0.64) (2wk) |
|                  | Cervical Rotation (mean calculated)        |              |                    |
|                  | G1                                         |              |                    |
|                  | G2                                         | 70.35 (0.8)  | 74.05 (0.68) (2wk) |
|                  | G3                                         | 69.84 (0.7)  | 74.97 (0.72) (2wk) |
|                  |                                            | 70.07 (0.94) | 75.83 (0.78) (2wk) |
|                  | Pain (NPRS, 0-10)                          |              |                    |
|                  | G1                                         | 6.4 (1.6)    | 3.1 (2.4) (4wk)    |
|                  | G2                                         | 6.8 (1.6)    | 2.7 (2.8) (4wk)    |
|                  | Disability (NDI)                           |              |                    |
|                  | G1                                         | 13.4 (4.9)   | 6.9 (4.9) (4wk)    |
|                  | G2                                         | 16.8 (7.9)   | 5.6 (4.4) (4wk)    |
|                  | Cervical Flexion (°)                       |              |                    |
|                  | G1                                         | 68.0 (6.2)   | 69.1 (3.7) (4wk)   |
|                  | G2                                         | 57.8 (13.9)  | 63.3 (8.6) (4wk)   |
| Onat et al. 2019 | Cervical Extension (°)                     |              |                    |
|                  | G1                                         | 58.3 (6.9)   | 59.7 (2.91) (4wk)  |
|                  | G2                                         | 52.2 (9.5)   | 57.8 (5.4) (4wk)   |
|                  | Right Cervical Lateral Flexion (°)         |              |                    |
|                  | G1                                         | 43.6 (4.2)   | 45.0 (0.0) (4wk)   |
|                  | G2                                         | 39.0 (7.6)   | 45.9 (5.6) (4wk)   |
|                  | Left Cervical Lateral Flexion (°)          |              |                    |
|                  | G1                                         | 43.9 (3.6)   | 45.0 (0.0) (4wk)   |
|                  | G2                                         | 38.8 (7.8)   | 45.9 (5.6) (4wk)   |
|                  | Cervical Lateral Flexion (mean calculated) |              |                    |
|                  | G1                                         | 43.75 (7.8)  | 45 (0.0) (4wk)     |
|                  | G2                                         | 38.9 (7.7)   | 45.9 (5.6) (4wk)   |
|                  | Right Cervical Rotation (°)                |              |                    |
|                  | G1                                         | 77.5 (10.5)  | 78.9 (4.6) (4wk)   |
|                  | G2                                         | 65.5 (17.4)  | 78.1 (6.1) (4wk)   |
| Onat et al. 2019 |                                            |              |                    |

|                                |                                     |                 |                   |                       |
|--------------------------------|-------------------------------------|-----------------|-------------------|-----------------------|
|                                | Left Cervical Rotation (°)          |                 |                   |                       |
|                                | G1                                  | 76.3 (11.3)     |                   | 79.1 (3.7) (4wk)      |
|                                | G2                                  | 65.5 (17.1)     |                   | 78.1 (6.1) (4wk)      |
|                                | Cervical Rotation (mean calculated) |                 |                   |                       |
|                                | G1                                  | 76.9 (10.9)     |                   | 79 (4.15) (4wk)       |
|                                | G2                                  | 65.5 (17.25)    |                   | 78.1 (6.1) (4wk)      |
|                                | Pain (VAS, 0-10)                    |                 |                   |                       |
|                                | G1                                  | 6.56 (1.63)     |                   | 2.4 (1.74) (12wk)     |
|                                | G2                                  | 6.23 (1.26)     |                   | 3.33 (2.22) (12wk)    |
| ZiaEIFar et al. 2019           | Disability (NPQ)                    |                 |                   |                       |
|                                | G1                                  | 2.65 (9.9)      |                   | 13.17 (11.5) (1wk)    |
|                                | G2                                  | 33 (7.09)       |                   | 21.39 (12.36) (1wk)   |
|                                |                                     |                 |                   | 12.4 (8.6) (12wk)     |
|                                |                                     |                 |                   | 19.32 (12.20) (12wk)  |
|                                | Pain (NPRS, 0-10)                   |                 |                   |                       |
|                                | G1                                  | 6.8 (1.7)       |                   | 2.6 (2.2) (3wk)       |
|                                | G2                                  | 7.2 (1.6)       |                   | 3.4 (2.1) (3wk)       |
| Sukareechai et al. 2019        | PPT (kPa)                           |                 |                   |                       |
|                                | G1                                  | 537.48 (142.14) |                   | 644.09 (128.81) (3wk) |
|                                | G2                                  | 519.71 (177.68) |                   | 657.41 (168.79) (3wk) |
|                                | Pain (NPRS,0-10)                    |                 |                   |                       |
|                                | G1                                  | 5.5 (1.4)       | 4.7 (2.1) (24h)   | 3.4 (2.2) (4wk)       |
|                                | G2                                  | 5.7 (1.7)       | 5.1 (1.9) (24h)   | 4.8 (2.1) (4wk)       |
| Arias-Buría et al. 2020        | Disability (NDI)                    |                 |                   |                       |
|                                | G1                                  | 21.7 (2.2)      |                   | 16 (2.0) (4wk)        |
|                                | G2                                  | 20.0 (2.1)      |                   | 16.0 (1.9) (4wk)      |
|                                | Pain (VAS, 0-10)                    |                 |                   |                       |
|                                | G1                                  | 5.79 (1.89)     |                   | 2.38 (1.85) (4wk)     |
|                                | G2 (N/A)                            | 5.52 (1.80)     |                   | 1.17 (1.12) (4wk)     |
|                                | G3                                  | 5.26 (1.46)     |                   | 3.85 (2.38) (4wk)     |
|                                |                                     |                 |                   | 3.91 (2.50) (12wk)    |
| Valiente Castrillo et al. 2020 | Disability (NDI)                    |                 |                   |                       |
|                                | G1                                  | 17.45 (4.94)    |                   | 12.00 (5.68) (4wk)    |
|                                | G2 (N/A)                            | 15.80 (4.62)    |                   | 7.19 (6.56) (4wk)     |
|                                | G3                                  | 16.78 (5.32)    |                   | 13.21 (7.26) (4wk)    |
|                                |                                     |                 |                   | 11.0 (6.06) (12wk)    |
|                                |                                     |                 |                   | 7.57 (5.33) (12wk)    |
|                                |                                     |                 |                   | 13.78 (8.78) (12wk)   |
|                                | Pain (VAS, 0-10)                    |                 |                   |                       |
|                                | G1                                  | 5.01 (1.52)     | 2.28 (1.58) (48h) | 2.26 (1.55) (1wk)     |
|                                | G2                                  | 4.56 (1.73)     | 2.04 (1.69) (48h) | 1.71 (1.29) (1wk)     |
|                                | Disability (NDI)                    |                 |                   |                       |

|                              |                              |                |                      |                      |
|------------------------------|------------------------------|----------------|----------------------|----------------------|
|                              | G1                           | 19.64 (7.32)   |                      | 13.09 (7.45), (1wk)  |
|                              | G2                           | 22.09 (9.75)   |                      | 12.27 (8.20) (1wk)   |
|                              | PPT (kPa)                    |                |                      |                      |
|                              | G1                           | 194.17 (54.91) | 266.73 (45.09) (48h) | 264.77 (50.99) (1wk) |
|                              | G2                           | 206.80 (50.99) | 376.57 (42.16) (48h) | 409.91 (45.11) (1wk) |
|                              | Cervical Flexion (°)         |                |                      |                      |
|                              | G1                           | 44.83 (9.85)   | 48.36 (9.31) (48h)   | 47.27 (8.41) (1wk)   |
|                              | G2                           | 44.59 (11.25)  | 54.73 (6.39) (48h)   | 51.27 (7.59) (1wk)   |
| García-de-Miguel et al. 2020 | Cervical Extension (°)       |                |                      |                      |
|                              | G1                           | 50.72 (9.72)   | 57.32 (7.49) (48h)   | 58.05 (7.95) (1wk)   |
|                              | G2                           | 52.81 (13.90)  | 56.64 (11.37) (48h)  | 57.68 (11.26) (1wk)  |
|                              | Cervical Rotation (°)        |                |                      |                      |
|                              | G1                           | 55.19 (13.62)  | 67.18 (11.00) (48h)  | 66.32 (9.81) (1wk)   |
|                              | G2                           | 60.53 (12.48)  | 70.95 (8.52) (48h)   | 70.11 (8.42) (1wk)   |
|                              | Cervical Lateral Flexion (°) |                |                      |                      |
|                              | G1                           | 36.44 (5.56)   | 40.09 (5.30) (48h)   | 40.70 (4.68) (1wk)   |
|                              | G2                           | 37.97 (4.36)   | 41.04 (5.08) (48h)   | 41.38 (5.56) (1wk)   |

BDI; Beck Depression Inventory; PCS: Pain Catastrophism Scale; VAS: Visual Analogue Scale; GDS-SF: Korean version of geriatric depression scales; wk.: Weeks; ROM: Range of Motion; PPT: Pressure Pain Threshold; NDI: Neck Disability Index; NPRS: Numeric Pain Rating Scale; NPQ: Northwick Park Neck Pain Questionnaire; NPDS: Neck Pain and Disability Score.\* Converted to mean and standard deviation values from median and interquartile range

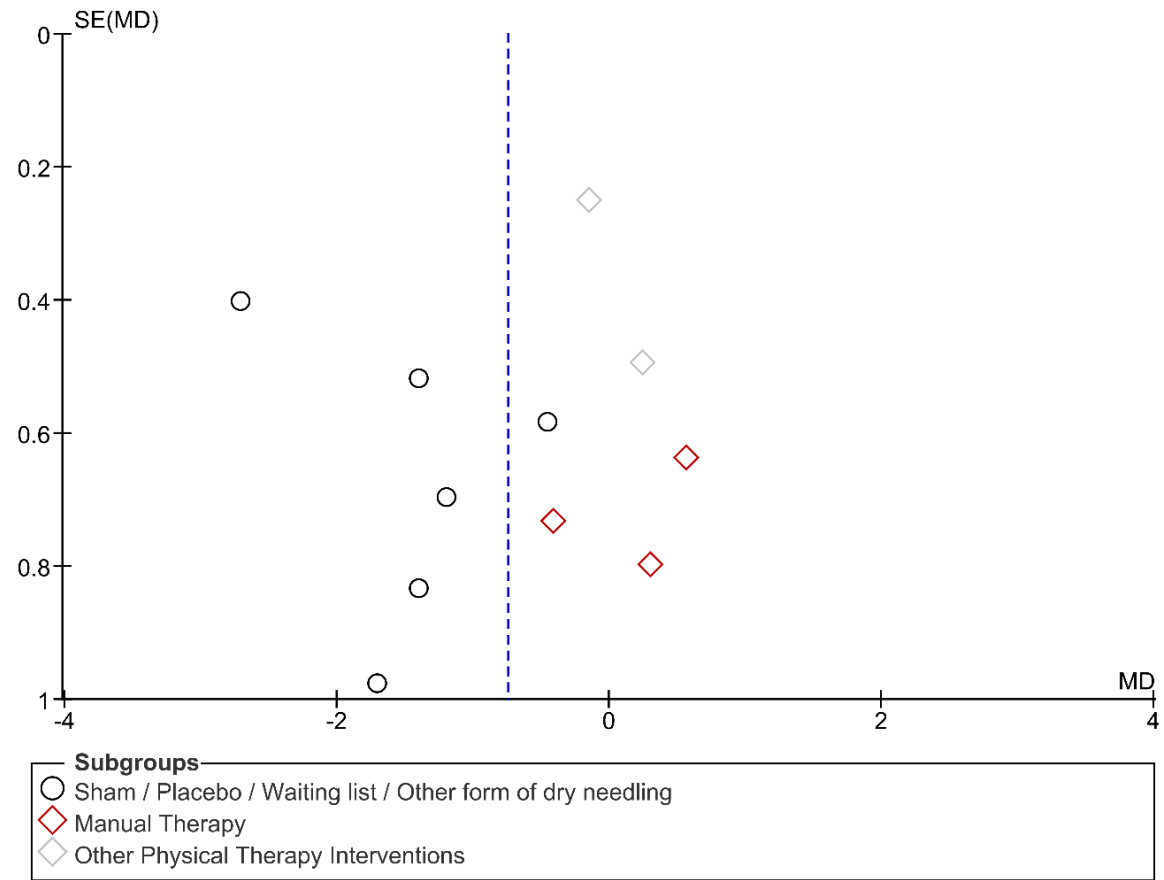

**Figure 1.** Funnel Plot of the trials ( $n = 11$ ) investigating the immediate effects of dry needling on pain intensity. The funnel plot showed small asymmetry not associated to potential publication bias. SE:Standard error; MD: Mean difference.

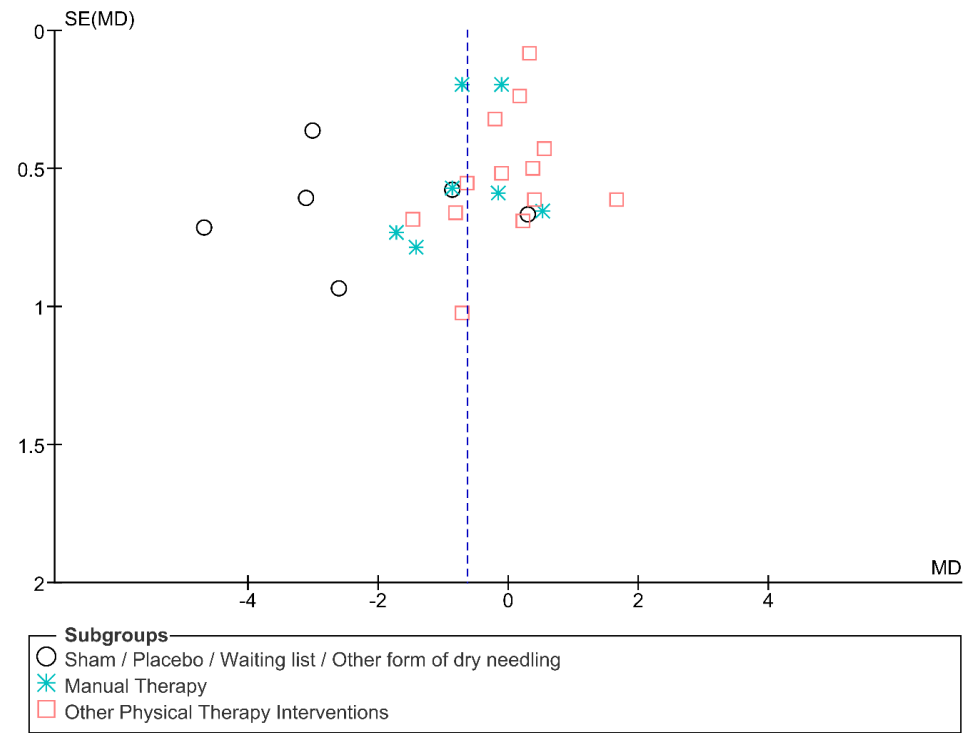

**Figure 2.** Funnel Plot of the trials ( $n=25$ ) investigating the short-term effects of dry needling on pain intensity. The funnel plot showed small asymmetry not associated to potential publication bias. SE:Standard error; MD: Mean difference.



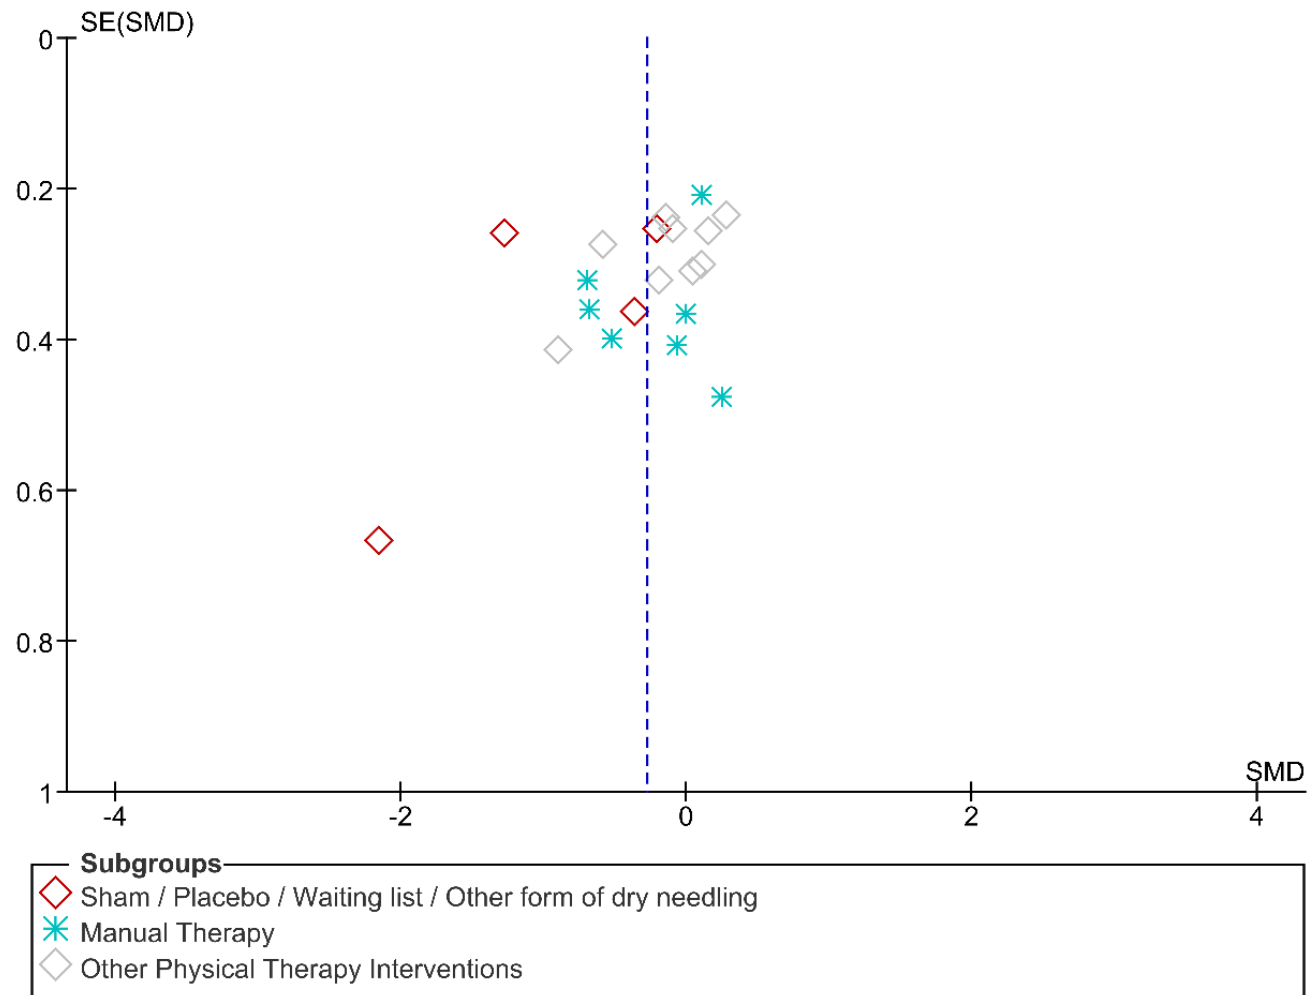

**Figure 3.** Funnel Plot of the trials ( $n = 20$ ) investigating the short-term effects of dry needling on pain-related disability. The funnel plot showed asymmetry due to the study by Itoh et al 2007, therefore, it was associated to potential publication bias. The exclusion of this study would tend to a symmetric funnel plot. SE:Standard error; SMD: Standard mean difference.

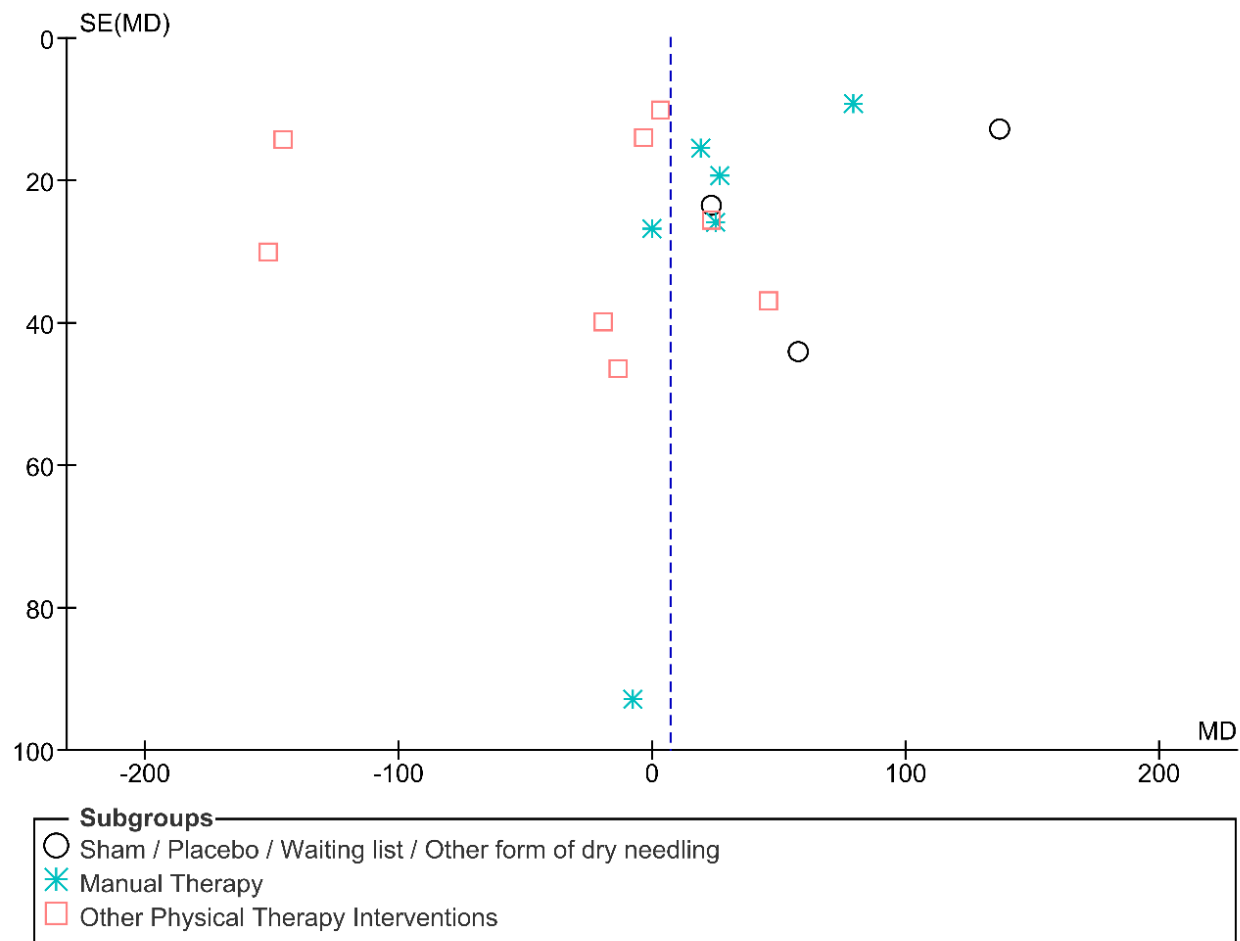

**Figure 4.** Funnel Plot of the trials ( $n = 17$ ) investigating the short-term effects of dry needling on pressure pain thresholds. The funnel plot showed small asymmetry not associated to potential publication bias. SE:Standard error; MD: Mean difference.

**Publisher's Note:** MDPI stays neutral with regard to jurisdictional claims in published maps and institutional affiliations.

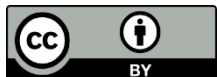

© 2020 by the authors. Licensee MDPI, Basel, Switzerland. This article is an open access article distributed under the terms and conditions of the Creative Commons Attribution (CC BY) license (<http://creativecommons.org/licenses/by/4.0/>).
